# Supplementary material for: How the weather affects the pain of citizen scientists using a smartphone app
Source: PubMed Central journal article supplement (PMC6811599; doi:10.1038/s41746-019-0180-3), 2019-10-24
Supplement: 41746_2019_180_MOESM1_ESM.pdf [file 41746_2019_180_MOESM1_ESM.pdf]

## Supplementary Material for

How the Weather Affects the Pain of Citizen Scientists Using a Smartphone App

William G. Dixon, Anna L. Beukenhorst, Belay Birlie Yimer, Louise Cook, Antonio Gasparini, Tal El-Hay, Bruce Hellman, Ben James, Ana M. Vicedo-Cabrera, Malcolm Maclure, Ricardo Silva, John Ainsworth, Huai Leng Pisaniello, Thomas House, Mark Lunt, Carolyn Gamble, Caroline Sanders, David M. Schultz, Jamie C. Sergeant, John McBeth

Correspondence to: [will.dixon@manchester.ac.uk](mailto:will.dixon@manchester.ac.uk)

## Additional Results and Sensitivity Studies

Participants were clustered into four engagement states, labeled as high, medium, low and very low engagers (13). The numbers in each state, for those with baseline questionnaire data and at least one pain score, and for those in the case-crossover analysis, are shown in figure S1 with retention by engagement cluster shown in figure S2. Baseline data stratified by engagement state is shown in table S2.

**Supplementary Figure 1.** Flow-chart of eligibility from app downloads to final cohort, including information on engagement states at each step.

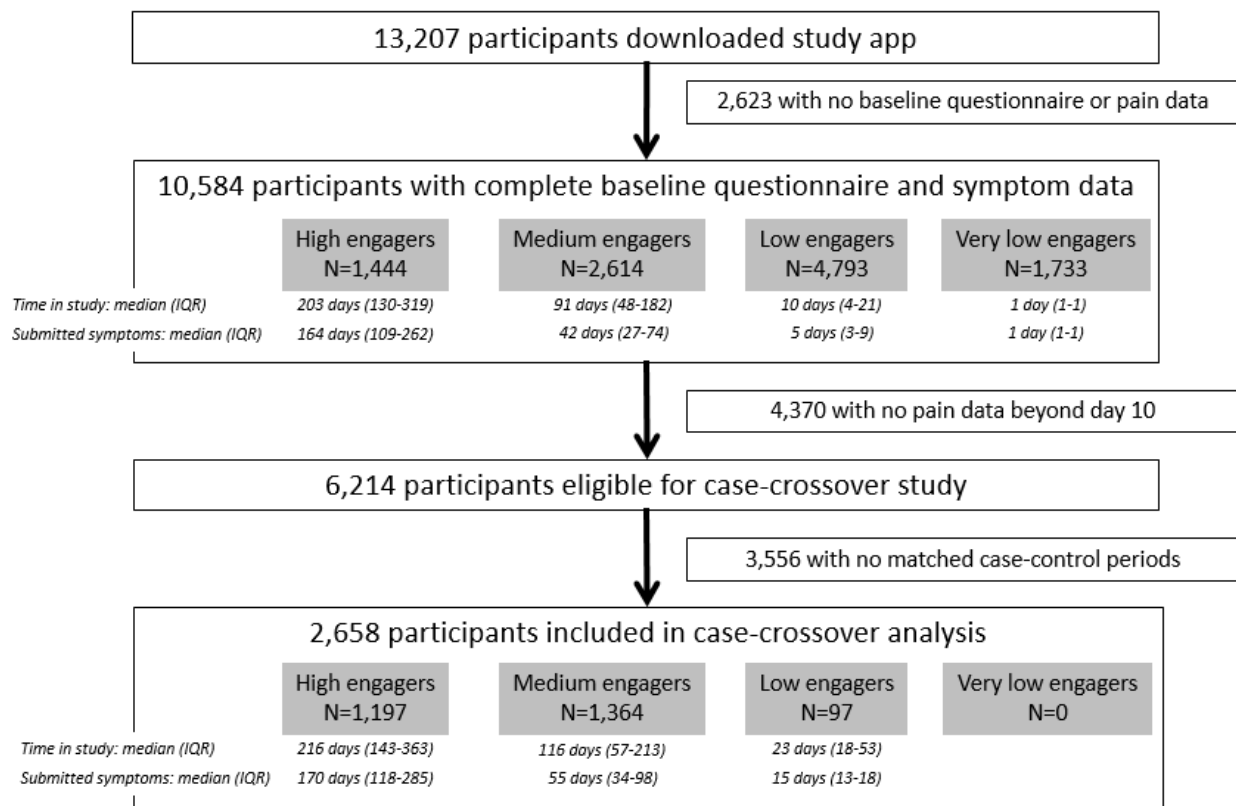

**Supplementary Figure 2.** Retention through time, stratified by engagement cluster. The graph represents the retention of active participants through time as a survival probability from the day of their recruitment, stratified by engagement cluster. Participants were censored when they were no longer eligible for follow-up. The shaded area represents the 95% confidence interval.

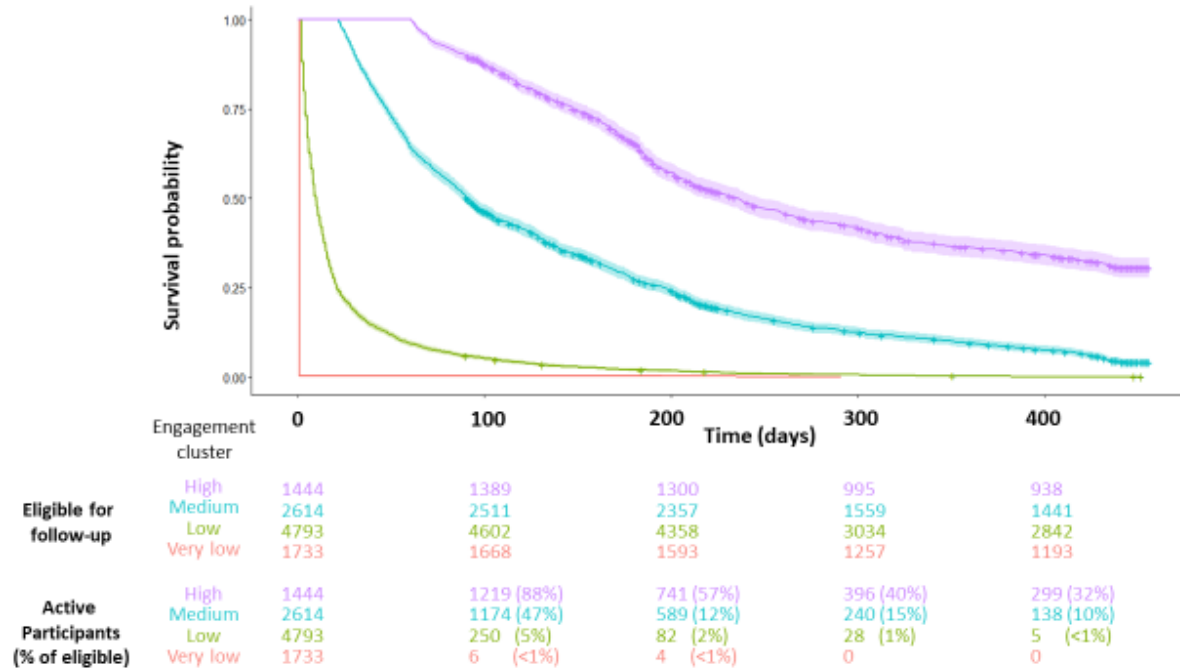

**Supplementary Figure 3.** Retention through time for participants included in the final analysis cohort (n=2658). The graph represents the retention of active participants through time as a survival probability from the day of their recruitment, limited to the 2658 participants who were included in the case-crossover analysis. Participants were censored when they were no longer eligible for follow-up.

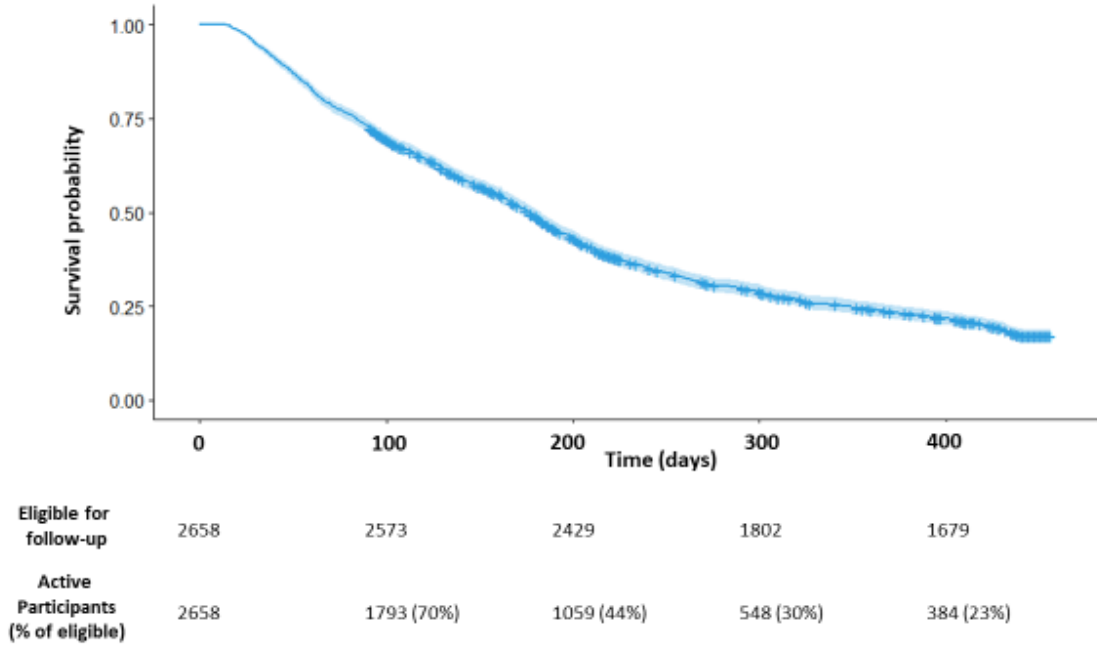

**Supplementary Figure 4:** Odds ratios for a pain event for each of the four state weather variable, stratified by disease (point estimates and 95% confidence intervals)

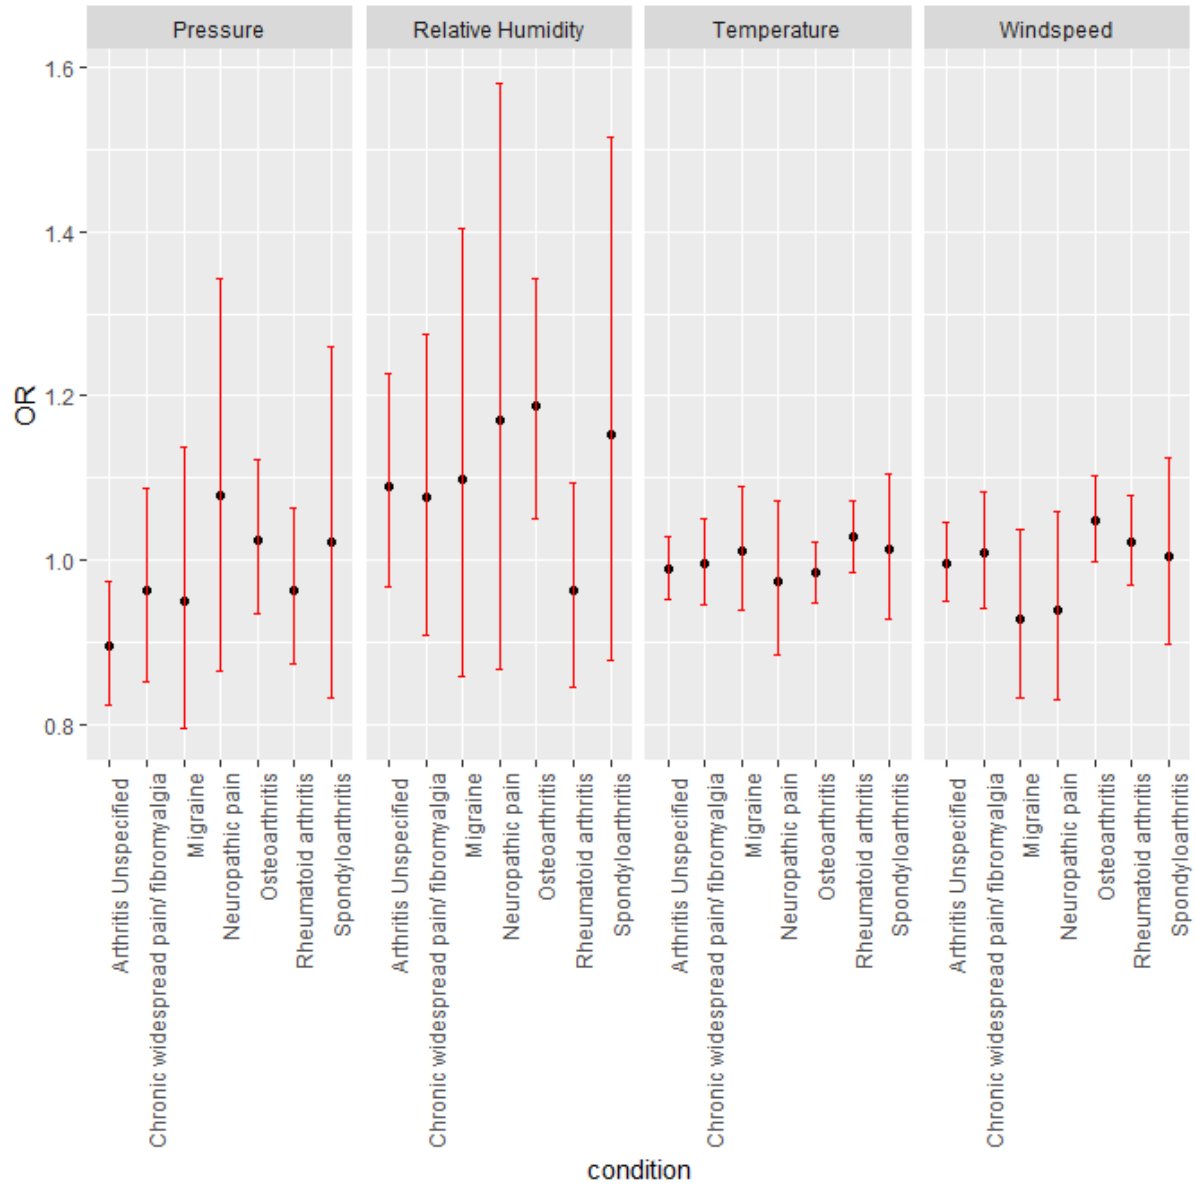

**Supplementary Figure 5.** Directed Acyclic Graph for the relationship between a pain event at day  $k$  ( $P$ ), the four state weather variables ( $W$ ), mood ( $M$ ) and exercise ( $E$ ).

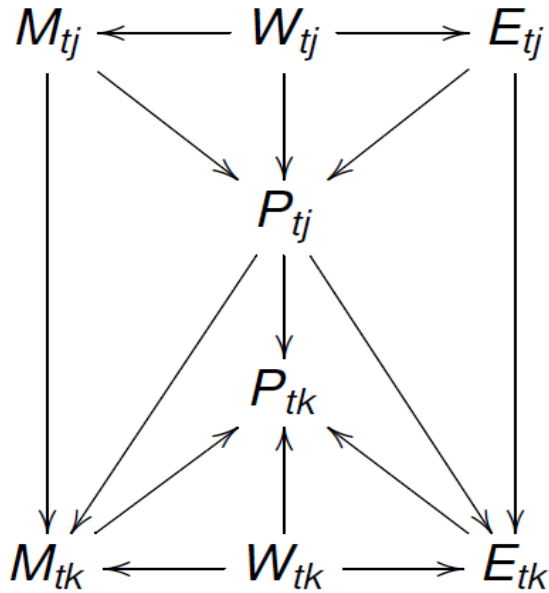

Figure S5 illustrates the relationship between a pain event at day  $k$  ( $P_{tk}$ ), the four state weather variables ( $W$ ), mood ( $M$ ) and exercise ( $E$ ). The likelihood of having a pain event today ( $P_{tk}$ ) is influenced by today's weather ( $W_{tk}$ ) directly as well as acting through mood ( $M_{tk}$ ) and exercise ( $E_{tk}$ ). Hence the path  $W_{tk} \rightarrow P_{tk}$  is the direct effect of weather while  $W_{tk} \rightarrow M_{tk} \rightarrow P_{tk}$  and  $W_{tk} \rightarrow E_{tk} \rightarrow P_{tk}$  are the effect of weather mediated by mood and exercise, respectively. In order to estimate the direct effect we need to block the latter two. However, doing so opens path  $W_{tk} \cdots > P_{tj}$  (pain event status in the previous day), since both variables are colliders. Hence, in the model used in this paper, we adjusted for  $P_{tj}$  which blocks this path in order to get the desired estimates. Adjusting for  $P_{tj}$  induces several paths between  $E_{tj}$  (exercise the previous day),  $M_{tj}$  (mood the previous day), and  $W_{tj}$  (weather the previous day), but all paths from these variables into  $P_{tk}$  will be blocked by  $P_{tj}$ . Time spent outside as a possible modifier is not included in the DAG

**Supplementary Table 1.** Baseline characteristics of study participants

|                                                                      | <b>Final case-crossover study cohort</b> | <b>Participants with complete baseline questionnaire and at least one pain recording</b> |
|----------------------------------------------------------------------|------------------------------------------|------------------------------------------------------------------------------------------|
| Number of participants, <i>N</i>                                     | 2658                                     | 10584                                                                                    |
| <b>DEMOGRAPHICS</b>                                                  |                                          |                                                                                          |
| Female: <i>N</i> (%)                                                 | 2210 (83.1)                              | 8554 (80.8)                                                                              |
| Age: mean (sd)                                                       | 51.25 (12.6)                             | 47.87 (13.2)                                                                             |
| <b>DIAGNOSIS: <i>N</i> (%)</b>                                       |                                          |                                                                                          |
| Rheumatoid arthritis                                                 | 506 (19.0)                               | 1954 (18.5)                                                                              |
| Osteoarthritis                                                       | 926 (34.8)                               | 2552 (24.1)                                                                              |
| Ankylosing spondylitis/<br>spondyloarthropathy                       | 235 (8.8)                                | 923 (8.7)                                                                                |
| Gout                                                                 | 97 (3.6)                                 | 371 (3.5)                                                                                |
| Arthritis (type not specified)                                       | 972 (36.6)                               | 3662 (34.6)                                                                              |
| Fibromyalgia/chronic widespread pain                                 | 665 (25.0)                               | 2791 (26.4)                                                                              |
| Chronic headache (including migraine)                                | 271 (10.2)                               | 1085 (10.3)                                                                              |
| Neuropathic pain                                                     | 371 (14.0)                               | 1593 (15.1)                                                                              |
| Other/no medical diagnosis                                           | 633 (23.8)                               | 2758 (26.1)                                                                              |
| <b>BELIEFS IN WEATHER-PAIN RELATIONSHIP: <i>N</i> (%)</b>            |                                          |                                                                                          |
| Belief that weather influences pain on a scale of 0-10: median (IQR) | 8 (6-9)                                  | 7 (6-9)                                                                                  |
| Weather conditions thought to be associated with pain                |                                          |                                                                                          |
| Rain                                                                 | 1959 (73.7)                              | 7705 (72.8)                                                                              |
| Cold weather                                                         | 1623 (61.1)                              | 6941 (65.6)                                                                              |
| Hot weather                                                          | 458 (17.2)                               | 1938 (18.3)                                                                              |
| Changes in barometric pressure                                       | 1077 (40.5)                              | 3687 (34.8)                                                                              |
| Changes in temperature                                               | 825 (31.0)                               | 3592 (33.9)                                                                              |
| Other belief                                                         | 125 (4.7)                                | 351 (3.3)                                                                                |

**Supplementary Table 2.** Patterns of engagement for the 10,584 participants with completed baseline questionnaires and at least one pain recording.

|                                                                                             | <b>Clusters of engagement (N = 10,584)</b> |                          |                       |                     |
|---------------------------------------------------------------------------------------------|--------------------------------------------|--------------------------|-----------------------|---------------------|
|                                                                                             | <b>High</b>                                | <b>Medium</b>            | <b>Low</b>            | <b>Very Low</b>     |
| Number of participants, <i>N</i>                                                            | 1444                                       | 2614                     | 4793                  | 1733                |
| Number of participants per engagement cluster included in the final case-crossover analysis | 1197                                       | 1364                     | 97                    | 0                   |
| <b>ENGAGEMENT</b>                                                                           |                                            |                          |                       |                     |
| Days in study<br>• Range<br>Median (IQR)                                                    | 61-456<br>203<br>(130-319)                 | 22-456<br>91<br>(48-182) | 2-452<br>10<br>(4-21) | 1-291<br>1<br>(1-1) |
| Number of days of pain data entry per individual<br>• Range<br>Median (IQR)                 | 4-449<br>160<br>(104-254)                  | 2-311<br>40<br>(26-72)   | 1-64<br>5<br>(2-9)    | 1-2<br>1<br>(1-1)   |
| Proportion of total days on which pain data entered per individual:<br>median (IQR)         | 82<br>(73-89)                              | 52<br>(38-67)            | 56<br>(32-81)         | 100<br>(100-100)    |
| <b>DEMOGRAPHICS</b>                                                                         |                                            |                          |                       |                     |
| Female: <i>N</i> (%)                                                                        | 1173 (81.2)                                | 2182 (83.5)              | 3867 (80.7)           | 1332 (76.9)         |
| Age: mean (sd)                                                                              | 54.0 (12.3)                                | 48.7 (12.4)              | 46.0 (13.1)           | 46.5 (13.8)         |
| <b>DIAGNOSIS: <i>N</i> (%)</b>                                                              |                                            |                          |                       |                     |
| Rheumatoid arthritis                                                                        | 284 (19.7)                                 | 496 (19.0)               | 870 (18.2)            | 304 (17.5)          |
| Osteoarthritis                                                                              | 587 (40.7)                                 | 805 (30.8)               | 918 (19.2)            | 242 (14.0)          |
| Ankylosing spondylitis/<br>spondyloarthropathy                                              | 129 (8.9)                                  | 230 (8.8)                | 424 (8.8)             | 140 (8.1)           |
| Gout                                                                                        | 49 (3.4)                                   | 100 (3.8)                | 154 (3.2)             | 68 (3.9)            |
| Arthritis (type not specified)                                                              | 570 (39.5)                                 | 872 (33.4)               | 1611 (33.6)           | 609 (35.1)          |
| Fibromyalgia/chronic<br>widespread pain                                                     | 343 (23.8)                                 | 699 (26.7)               | 1336 (27.9)           | 413 (23.8)          |
| Chronic headache (including<br>migraine)                                                    | 125 (8.7)                                  | 254 (9.7)                | 538 (11.2)            | 168 (9.7)           |
| Neuropathic pain                                                                            | 206 (14.3)                                 | 414 (15.8)               | 736 (15.4)            | 237 (13.7)          |
| Other/no medical diagnosis                                                                  | 293 (20.3)                                 | 656 (25.1)               | 1305 (27.2)           | 504 (29.1)          |
| <b>BELIEFS IN WEATHER–PAIN RELATIONSHIP: <i>N</i> (%)</b>                                   |                                            |                          |                       |                     |
| Belief that weather influences<br>pain on a scale of 0–10: median<br>(IQR)                  | 7 (6-9)                                    | 8 (6-9)                  | 7 (6-9)               | 7 (5-8)             |
| Weather conditions thought to be associated with pain                                       |                                            |                          |                       |                     |



|                                |             |             |             |             |
|--------------------------------|-------------|-------------|-------------|-------------|
| Rain                           | 1064 (73.7) | 1928 (73.8) | 3519 (73.4) | 1194 (68.9) |
| Cold weather                   | 890 (61.6)  | 1657 (63.4) | 3242 (67.6) | 1152 (66.5) |
| Hot weather                    | 257 (17.8)  | 464 (17.8)  | 922 (19.2)  | 295 (17.0)  |
| Changes in barometric pressure | 531 (36.8)  | 1023 (39.1) | 1608 (33.5) | 525 (30.3)  |
| Changes in temperature         | 432 (29.9)  | 874 (33.4)  | 1686 (35.2) | 600 (34.6)  |
| Other belief                   | 69 (4.8)    | 110 (4.2)   | 136 (2.8)   | 36 (2.1)    |

**Supplementary Table 3:** Case crossover analysis including an interaction term between time spent outside and temperature, relative humidity, and wind speed.

| <b>Model</b>           | <b>Variable</b>                             | <b>OR (95% CI)</b>  |
|------------------------|---------------------------------------------|---------------------|
| With temperature       | Temperature                                 | 0.990 (0.977–1.004) |
|                        | Little time spent outside                   | 1.035 (0.911–1.175) |
|                        | Interaction term                            | 1.017 (1.005–1.030) |
| With relative humidity | Temperature, when little time spent outside | 1.003 (0.980–1.027) |
|                        | Relative humidity                           | 1.179 (1.113–1.249) |
|                        | Little time spent outside                   | 1.698 (0.980–2.943) |
| With wind speed        | Interaction term                            | 0.957 (0.896–1.023) |
|                        | Wind speed                                  | 1.032 (1.007–1.057) |
|                        | Little time spent outside                   | 1.298 (1.140–1.478) |
|                        | Interaction term                            | 0.983 (0.956–1.011) |

**Supplementary Table 4.** Standardized odds ratios and relative importance of weather variables in the case crossover analysis

| <b>Predictor</b>                       | <b>Standardized Odds Ratio (95% CI)</b> | <b>Relative Importance (Summed Akaike weight*)</b> |
|----------------------------------------|-----------------------------------------|----------------------------------------------------|
| Temperature<br>(per sd increase)       | 0.981<br>(0.929–1.035)                  | 0.32                                               |
| Relative humidity<br>(per sd increase) | 1.119<br>(1.084–1.154)                  | 1                                                  |
| Pressure<br>(per sd increase)          | 0.958<br>(0.930– 0.986)                 | 0.96                                               |
| Wind speed<br>(per sd increase)        | 1.041<br>(1.010– 1.073)                 | 0.89                                               |

Multivariable model including the four state weather variables

\*A variable that shows up in models with large weights will receive a high summed Akaike weight and is considered important.

**Supplementary Table 5:** Addition of precipitation to the univariable and multivariable case-crossover analysis results.

| <b>Model</b>                                                 | <b>Variable</b>                                          | <b>Odds ratio (95% CI)</b> |
|--------------------------------------------------------------|----------------------------------------------------------|----------------------------|
| Univariable                                                  | Precipitation<br>(per 1mm change)                        | 1.005 (0.999–1.011)        |
| Multivariable<br>(weather only)                              | Temperature                                              | 0.995 (0.984–1.006)        |
|                                                              | Relative humidity<br>(per 10 percentage point<br>change) | 1.145 (1.103–1.188)        |
|                                                              | Pressure<br>(per 10 mbar change)                         | 0.958 (0.932–0.985)        |
|                                                              | Wind speed                                               | 1.021 (1.005–1.036)        |
|                                                              | Precipitation                                            | 0.996 (0.989–1.003)        |
| Multivariable,<br>including mood<br>and physical<br>activity | Temperature                                              | 1.000 (0.988–1.012)        |
|                                                              | Relative humidity<br>(per 10 percentage point<br>change) | 1.120 (1.077–1.165)        |
|                                                              | Pressure<br>(per 10 mbar change)                         | 0.963 (0.935–0.992)        |
|                                                              | Wind speed                                               | 1.012 (0.996–1.028)        |
|                                                              | Precipitation                                            | 0.996 (0.989–1.003)        |
|                                                              | Low mood                                                 | 4.046 (3.786–4.325)        |
|                                                              | High activity                                            | 0.951 (0.891–1.015)        |

**Supplementary Table 6:** Inclusion of day of the week into the multivariable analysis including mood and activity.

| <b>Variable</b>                                       | <b>OR (95% CI)</b>  |
|-------------------------------------------------------|---------------------|
| Temperature                                           | 1.000 (0.989–1.013) |
| Relative humidity<br>(per 10 percentage point change) | 1.116 (1.074–1.16)  |
| Pressure<br>(per 10 mbar change)                      | 0.97 (0.944–0.998)  |
| Wind speed                                            | 1.012 (0.996–1.028) |
| Low mood                                              | 4.093 (3.833–4.371) |
| High activity                                         | 0.937 (0.878–0.999) |
| Monday                                                | 1.139 (1.035–1.253) |
| Tuesday                                               | 1.094 (0.992–1.205) |
| Wednesday                                             | 1.037 (0.940–1.145) |
| Thursday                                              | 1.142 (1.035–1.261) |
| Friday                                                | 1.060 (0.959–1.171) |
| Saturday                                              | 1.292 (1.172–1.423) |
| Sunday                                                | Referent            |

**Supplementary Table 7.** Effect of lagged weather variables on pain in the case crossover analysis. Weather days prior to the hazard/control period are added sequentially in single day increments into the multivariable model

| <b>Variable</b>                               | <b>Same day</b>        | <b>Up to -1 day</b>    | <b>Up to -2 days</b>   | <b>Up to -3 days</b>   | <b>Up to -4 days</b>   | <b>Up to -5 days</b>   |
|-----------------------------------------------|------------------------|------------------------|------------------------|------------------------|------------------------|------------------------|
| <b>Temperature (hazard/control day)</b>       | 1.001<br>(0.989-1.013) | 1.004<br>(0.988-1.020) | 1.003<br>(0.987-1.020) | 1.002<br>(0.986-1.019) | 1.001<br>(0.985-1.018) | 1.000<br>(0.984-1.017) |
| <b>Relative humidity (hazard/control day)</b> | 1.117<br>(1.075-1.160) | 1.141<br>(1.094-1.189) | 1.142<br>(1.095-1.191) | 1.143<br>(1.096-1.192) | 1.145<br>(1.098-1.195) | 1.144<br>(1.096-1.193) |
| <b>Pressure (hazard/control day)</b>          | 0.966<br>(0.940-0.993) | 0.967<br>(0.924-1.012) | 0.960<br>(0.914-1.009) | 0.963<br>(0.916-1.012) | 0.962<br>(0.915-1.011) | 0.961<br>(0.914-1.010) |
| <b>Wind speed (hazard/control day)</b>        | 1.011<br>(0.995-1.027) | 1.015<br>(0.997-1.034) | 1.014<br>(0.996-1.033) | 1.015<br>(0.997-1.034) | 1.016<br>(0.997-1.034) | 1.015<br>(0.997-1.034) |
| <b>High activity (hazard/control day)</b>     | 0.939<br>(0.881-1.002) | 0.936<br>(0.877-0.998) | 0.935<br>(0.877-0.998) | 0.935<br>(0.877-0.998) | 0.938<br>(0.879-1.001) | 0.938<br>(0.879-1.001) |
| <b>Low mood (hazard/control day)</b>          | 4.083<br>(3.824-4.360) | 4.070<br>(3.810-4.346) | 4.061<br>(3.802-4.337) | 4.067<br>(3.808-4.345) | 4.072<br>(3.812-4.350) | 4.079<br>(3.818-4.358) |
| <b>Temperature (preceding day)</b>            | NA                     | 0.998<br>(0.983-1.013) | 1.000<br>(0.980-1.020) | 1.001<br>(0.981-1.022) | 1.003<br>(0.983-1.024) | 1.004<br>(0.983-1.024) |
| <b>Relative humidity (preceding day)</b>      | NA                     | 0.995<br>(0.991-0.999) | 0.994<br>(0.989-0.998) | 0.993<br>(0.989-0.998) | 0.993<br>(0.989-0.998) | 0.993<br>(0.989-0.998) |
| <b>Pressure (preceding day)</b>               | NA                     | 0.999<br>(0.995-1.004) | 1.001<br>(0.994-1.008) | 1.000<br>(0.993-1.008) | 1.000<br>(0.993-1.008) | 1.001<br>(0.993-1.008) |
| <b>Wind speed (preceding day)</b>             | NA                     | 0.991<br>(0.973-1.009) | 0.990<br>(0.970-1.010) | 0.989<br>(0.969-1.010) | 0.988<br>(0.968-1.008) | 0.987<br>(0.967-1.008) |
| <b>Temperature (2 days ago)</b>               | NA                     | NA                     | 0.997<br>(0.981-1.012) | 0.991<br>(0.971-1.012) | 0.990<br>(0.970-1.011) | 0.990<br>(0.969-1.010) |
| <b>Relative humidity (2 days ago)</b>         | NA                     | NA                     | 1.004<br>(1.000-1.008) | 1.006<br>(1.001-1.010) | 1.006<br>(1.001-1.010) | 1.006<br>(1.001-1.010) |
| <b>Pressure (2 days ago)</b>                  | NA                     | NA                     | 0.999<br>(0.994-1.004) | 1.000<br>(0.992-1.007) | 1.000<br>(0.992-1.008) | 0.999<br>(0.991-1.007) |

|                                       |    |    |                        |                        |                        |                        |
|---------------------------------------|----|----|------------------------|------------------------|------------------------|------------------------|
| <b>Wind speed (2 days ago)</b>        | NA | NA | 1.004<br>(0.986-1.022) | 1.006<br>(0.986-1.027) | 1.006<br>(0.986-1.027) | 1.006<br>(0.986-1.027) |
| <b>Temperature (3 days ago)</b>       | NA | NA | NA                     | 1.008<br>(0.993-1.024) | 1.011<br>(0.991-1.032) | 1.011<br>(0.991-1.033) |
| <b>Relative humidity (3 days ago)</b> | NA | NA | NA                     | 0.997<br>(0.993-1.001) | 0.996<br>(0.991-1.000) | 0.996<br>(0.991-1.001) |
| <b>Pressure (3 days ago)</b>          | NA | NA | NA                     | 0.999<br>(0.994-1.004) | 1.000<br>(0.992-1.007) | 1.001<br>(0.993-1.009) |
| <b>Wind speed (3 days ago)</b>        | NA | NA | NA                     | 0.999<br>(0.981-1.017) | 1.002<br>(0.982-1.022) | 1.002<br>(0.982-1.022) |
| <b>Temperature (4 days ago)</b>       | NA | NA | NA                     | NA                     | 0.995<br>(0.979-1.010) | 0.999<br>(0.979-1.019) |
| <b>Relative humidity (4 days ago)</b> | NA | NA | NA                     | NA                     | 1.002<br>(0.998-1.006) | 1.002<br>(0.998-1.007) |
| <b>Pressure (4 days ago)</b>          | NA | NA | NA                     | NA                     | 1.000<br>(0.995-1.005) | 0.997<br>(0.990-1.005) |
| <b>Wind speed (4 days ago)</b>        | NA | NA | NA                     | NA                     | 0.994<br>(0.976-1.012) | 0.992<br>(0.972-1.012) |
| <b>Temperature (5 days ago)</b>       | NA | NA | NA                     | NA                     | NA                     | 0.994<br>(0.979-1.009) |
| <b>Relative humidity (5 days ago)</b> | NA | NA | NA                     | NA                     | NA                     | 0.999<br>(0.994-1.003) |
| <b>Pressure (5 days ago)</b>          | NA | NA | NA                     | NA                     | NA                     | 1.002<br>(0.997-1.007) |
| <b>Wind speed (5 days ago)</b>        | NA | NA | NA                     | NA                     | NA                     | 1.003<br>(0.985-1.021) |

**Supplementary Table 8.** Inclusion of change in weather variable from the preceding day into the multivariable analysis including mood and activity.

| <b>Variable</b>                                                                  | <b>Odds ratio (95% CI)</b> |
|----------------------------------------------------------------------------------|----------------------------|
| Temperature<br>(per 1 °C change)                                                 | 1.002 (0.988–1.015)        |
| Relative humidity<br>(per 10 percentage point change)                            | 1.084 (1.034–1.136)        |
| Pressure<br>(per 10 mbar change)                                                 | 0.959 (0.931–0.988)        |
| Wind speed<br>(per 1 ms <sup>-1</sup> change)                                    | 1.006 (0.987–1.025)        |
| Change in temperature<br>(per 1 °C increase from yesterday)                      | 1.002 (0.987–1.018)        |
| Change in relative humidity<br>(per 10 percentage point increase from yesterday) | 1.005 (1.001–1.009)        |
| Change in pressure<br>(per 10 mbar increase from yesterday)                      | 1.001 (0.996–1.005)        |
| Change in wind speed<br>(per 1 ms <sup>-1</sup> increase from yesterday)         | 1.009 (0.991–1.027)        |
| Low mood on hazard/control day                                                   | 4.70 (3.810–4.346)         |
| High activity on hazard/control day                                              | 0.936 (0.877–0.998)        |



**Supplementary Table 9.** Effect of temperature, pressure, humidity and wind speed, stratified by disease.

| <b>Disease</b>        | <b>Arthritis (unspecified)</b> | <b>Osteo-<br/>arthritis</b> | <b>Rheumatoid<br/>arthritis</b> | <b>Chronic<br/>widespread<br/>pain/<br/>fibromyalgia</b> | <b>Neuro-<br/>pathic<br/>pain</b> | <b>Mig-<br/>raine</b> | <b>Spondylo-<br/>arthritis</b> |
|-----------------------|--------------------------------|-----------------------------|---------------------------------|----------------------------------------------------------|-----------------------------------|-----------------------|--------------------------------|
| Temperature           | 0.990 (0.953-1.029)            | 0.985 (0.948-1.023)         | 1.028 (0.985-1.073)             | 0.996 (0.945-1.05)                                       | 0.973 (0.884-1.072)               | 1.012 (0.939-1.09)    | 1.013 (0.929-1.105)            |
| Relative humidity     | 1.090 (0.967-1.228)            | 1.188 (1.05-1.344)          | 0.962 (0.845-1.095)             | 1.077 (0.908-1.276)                                      | 1.171 (0.866-1.582)               | 1.098 (0.858-1.404)   | 1.154 (0.878-1.516)            |
| Pressure              | 0.896 (0.824-0.975)            | 1.024 (0.934-1.123)         | 0.964 (0.874-1.063)             | 0.963 (0.852-1.088)                                      | 1.078 (0.865-1.343)               | 0.951 (0.795-1.138)   | 1.023 (0.831-1.26)             |
| Wind speed            | 0.996 (0.949-1.045)            | 1.049 (0.999-1.102)         | 1.023 (0.969-1.079)             | 1.009 (0.941-1.083)                                      | 0.938 (0.829-1.06)                | 0.929 (0.833-1.037)   | 1.005 (0.898-1.125)            |
| High activity         | 0.943 (0.771-1.153)            | 1.130 (0.922-1.385)         | 0.860 (0.683-1.084)             | 0.792 (0.59-1.063)                                       | 1.120 (0.643-1.951)               | 1.061 (0.683-1.649)   | 0.968 (0.613-1.531)            |
| Low mood              | 4.028 (3.257-4.983)            | 3.902 (3.16-4.819)          | 4.702 (3.765-5.873)             | 3.582 (2.696-4.759)                                      | 7.956 (4.595-13.775)              | 2.752 (1.871-4.048)   | 5.145 (3.237-8.178)            |
| <i>N</i> participants | 305                            | 231                         | 236                             | 122                                                      | 44                                | 44                    | 53                             |

Analysis restricted to 1035 participants that were eligible for the case-crossover analysis *and* reported only one of these diagnoses; the remaining 1623 participants reported 2 or more of these conditions.

**Supplementary Table 10.** Effect of temperature, relative humidity, pressure and wind speed, stratified by number of self-reported sites of pain (single versus multiple)

| <b>Number of pain sites</b>                              | <b>Single site of pain</b> | <b>Multiple sites of pain</b> |
|----------------------------------------------------------|----------------------------|-------------------------------|
| <i>N</i> participants                                    | 234                        | 2424                          |
| Temperature                                              | 1.029 (0.99-1.069)         | 0.998 (0.986-1.011)           |
| Relative humidity<br>(per 10 percentage point<br>change) | 1.151 (1.019-1.301)        | 1.113 (1.069-1.159)           |
| Pressure<br>(per 10 mbar change)                         | 0.957 (0.875-1.047)        | 0.967 (0.94-0.996)            |
| Wind speed                                               | 1.017 (0.966-1.069)        | 1.010 (0.994-1.027)           |
| High activity                                            | 1.005 (0.817-1.237)        | 0.933 (0.872-0.999)           |
| Low mood                                                 | 3.071 (2.488-3.792)        | 4.206 (3.925-4.508)           |

**Supplementary Table 11.** Effect of temperature, relative humidity, pressure and wind speed, stratified by prior belief.

| <b>Prior belief</b>                                      | <b>Weak prior belief (0–6)</b> | <b>Strong prior belief (7–10)</b> |
|----------------------------------------------------------|--------------------------------|-----------------------------------|
| <i>N</i> participants                                    | 828                            | 1830                              |
| Temperature                                              | 1.006 (0.985-1.028)            | 0.999 (0.985-1.013)               |
| Relative humidity<br>(per 10 percentage point<br>change) | 1.143 (1.066-1.227)            | 1.106 (1.057-1.158)               |
| Pressure<br>(per 10 mbar change)                         | 0.992 (0.943-1.043)            | 0.955 (0.924-0.987)               |
| Wind speed                                               | 0.997 (0.969-1.026)            | 1.017 (0.998-1.036)               |
| High activity                                            | 1.006 (0.896-1.129)            | 0.912 (0.844-0.986)               |
| Low mood                                                 | 3.826 (3.399-4.305)            | 4.204 (3.885-4.549)               |

**Supplementary Table 12.** Sensitivity analysis including all participants without follow-up restriction, alongside the final analysis restricting to those with 10+ days of data entry.

| Variable                                        | Multivariable odds ratio (95% CI)      |                                      |
|-------------------------------------------------|----------------------------------------|--------------------------------------|
|                                                 | No restrictions:<br>1+ days data entry | Restricted to<br>10+ days data entry |
| <i>N</i>                                        | 3309                                   | 2658                                 |
| Temperature<br>• Per 1°C                        | 0.999 (0.985-1.013)                    | 1.001 (0.989-1.013)                  |
| Relative humidity<br>• Per 10 percentage points | 1.108 (1.06-1.158)                     | 1.117 (1.075-1.16)                   |
| Pressure<br>• Per 10 mbar                       | 0.973 (0.942-1.005)                    | 0.966 (0.94-0.993)                   |
| Wind speed<br>• Per 1ms <sup>-1</sup>           | 1.003 (0.985-1.022)                    | 1.011 (0.995-1.027)                  |
| High activity                                   | 0.945 (0.877-1.018)                    | 0.939 (0.881-1.002)                  |
| Low mood                                        | 4.074 (3.775-4.397)                    | 4.083 (3.824-4.36)                   |
